# Supplementary material for: 53BP1 can limit sister-chromatid rupture and rearrangements driven by a distinct ultrafine DNA bridging-breakage process
Source: PubMed Central journal article supplement (PMC5813243; doi:10.1038/s41467-018-03098-y), 2018-02-14
Supplement: 41467_2018_3098_MOESM1_ESM.pdf [file 41467_2018_3098_MOESM1_ESM.pdf]

## **Supplementary Information**

**53BP1 can limit sister-chromatid rupture and rearrangements driven by  
a distinct ultrafine DNA bridging-breakage process**

**Tiwari et al.**

# Supplementary Figure 1

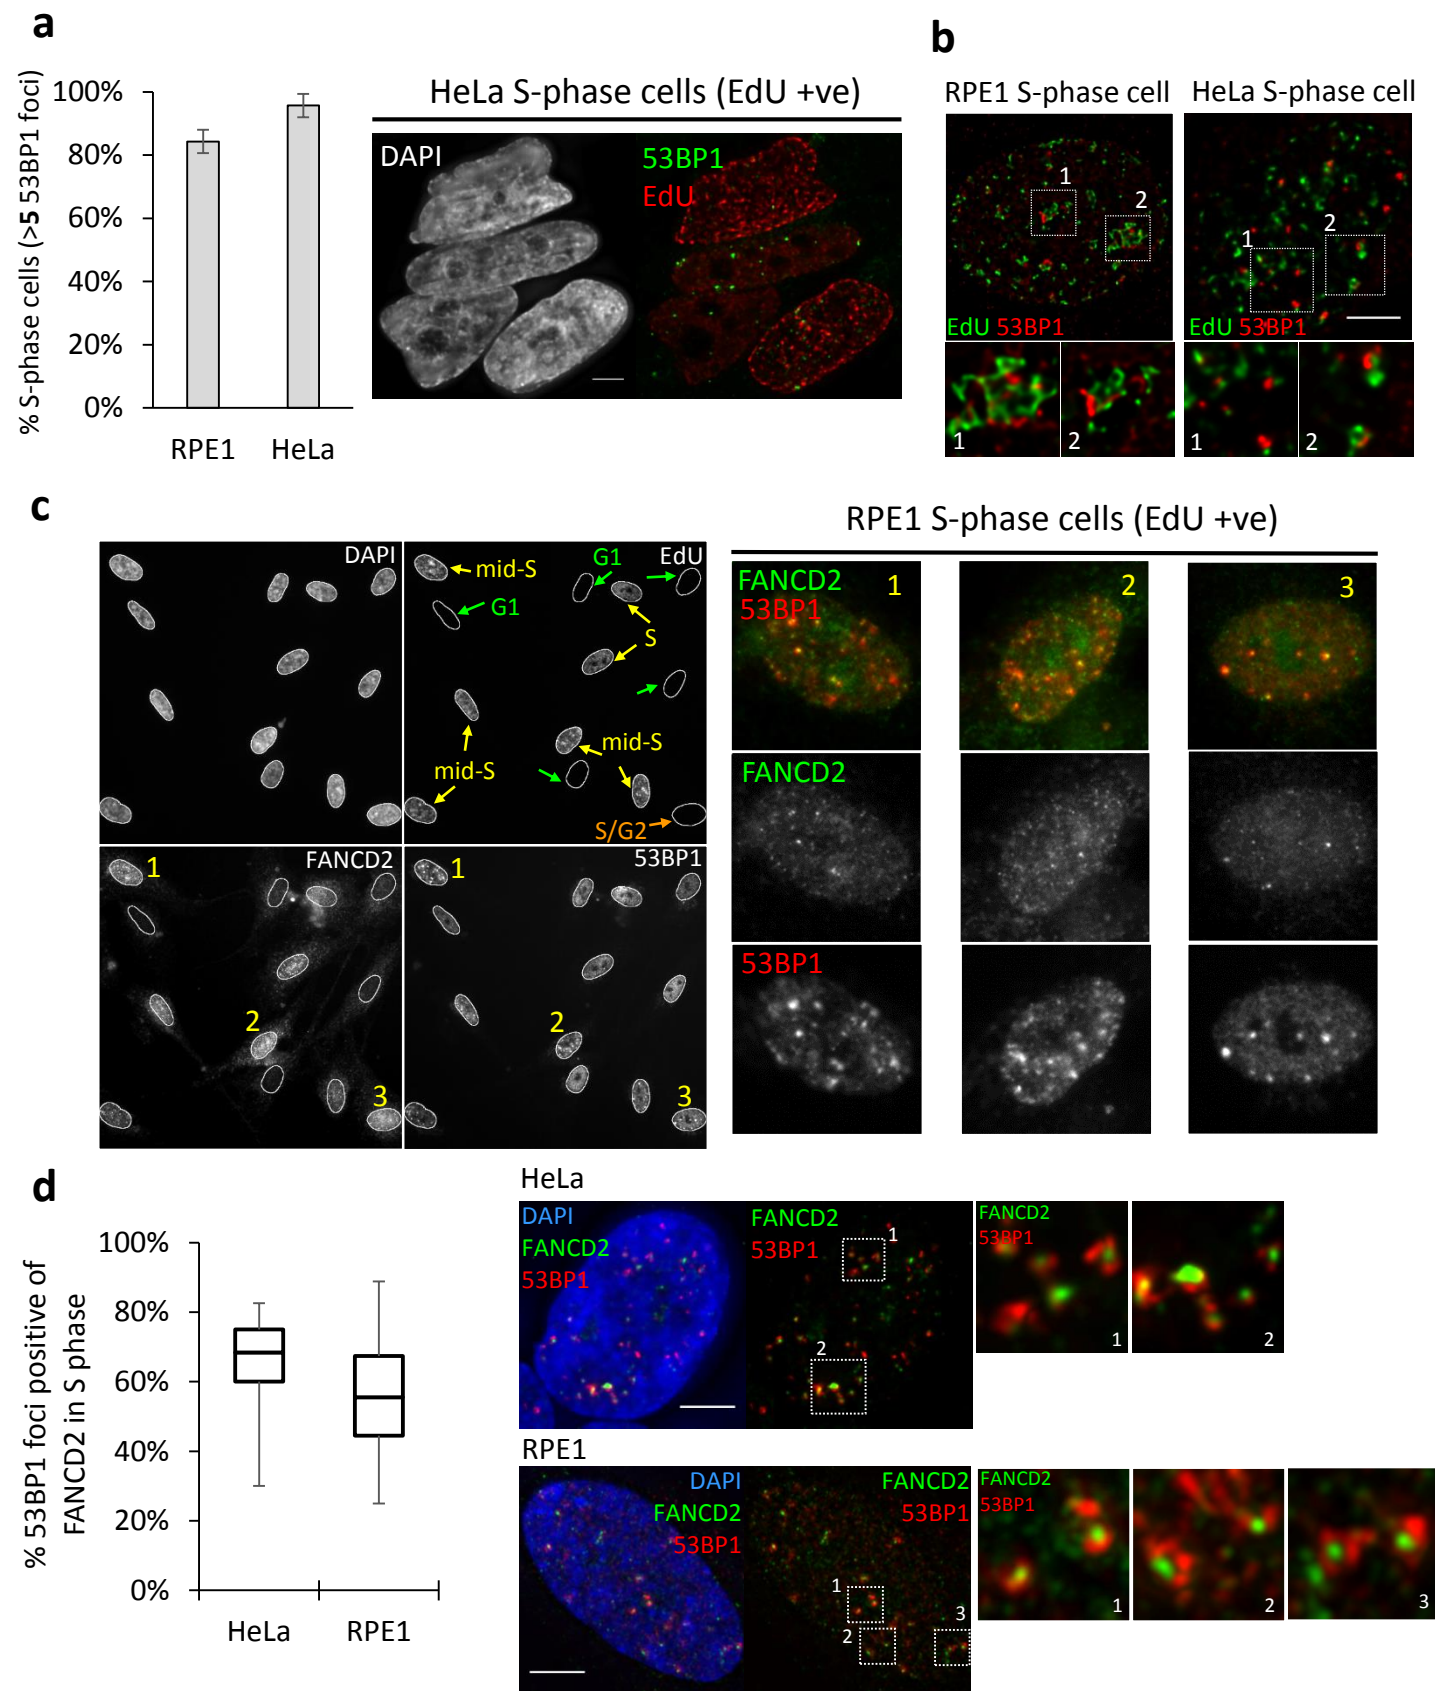

**Supplementary Figure 1. Adjacent co-localisation of FANCD2 and 53BP1 during S phases of normal and cancer cells. (a)** Quantification of 53BP1 foci formation in unperturbed RPE1 and HeLa S-phase cells (**Left**). EdU is used to label S-phase cells. Numbers of S-phase cells counted: RPE1=794, HeLa=611 from 3 independent experiments. 53BP1 foci (green) are detected in EdU-labelled (red) HeLa cells (**Right**). Error bars represent s.d.

**(b)** 53BP1 (red) localised adjacently to newly synthesised DNA regions pulse-labelled by EdU (green), in RPE1 (**Left**) and HeLa (**Right**) cells. Inset shows enlarged view of the indicated regions.

**(c)** 53BP1 localised adjacently to FANCD2 foci in S phase cells. RPE1 cells were EdU labelled and immunostained for FANCD2 and 53BP1. Representative images showing cells in different cell cycle phases (green arrows: G1; yellow: S; orange: S/G2). Nuclei were outlined based on DAPI staining. Right panels showing enlarged views of the indicated cells and the co-localisation of 53BP1 (red) and FANCD2 (green) foci in S phase.

**(d) Left:** A box plot showing the percentage of 53BP1 foci positive of FANCD2 in S-phase HeLa and RPE1 S-phase cells. 20 to 30 z-stacking images were acquired in unperturbed S-phase cells. Total numbers of 53BP1 foci in HeLa (n=796 foci) and in RPE1 (n=601 foci) are scored in 30 S-phase cells. Error bars represent s.e.m. **Right:** Representative examples of 53BP1 proteins (red) accumulating around FANCD2 (green) foci in unperturbed HeLa and RPE1 cells. Insets show enlarged views of the indicated regions.

# Supplementary Figure 2

## a

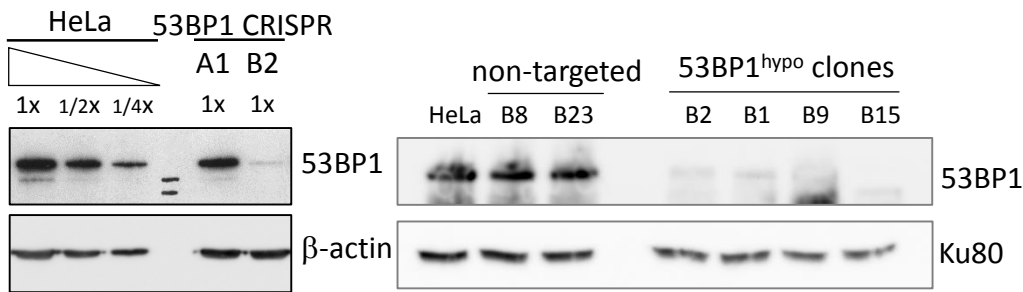

## c

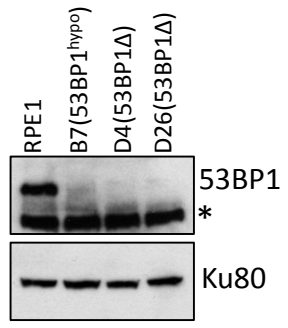

## b

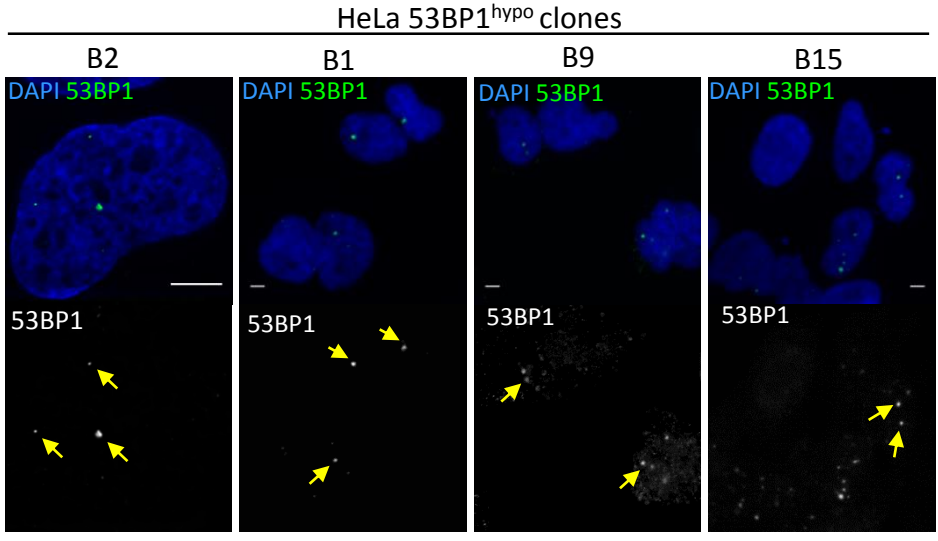

## d

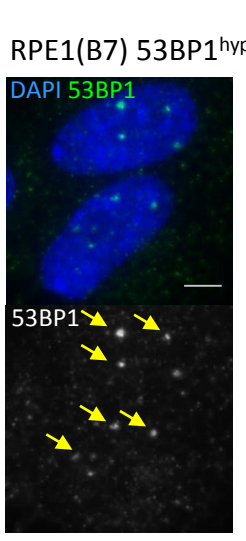

## e

## f

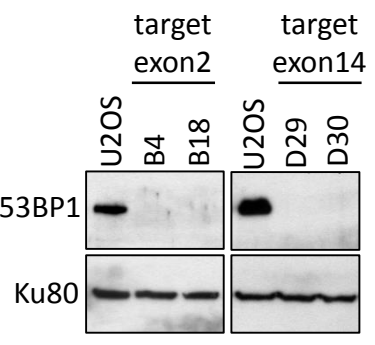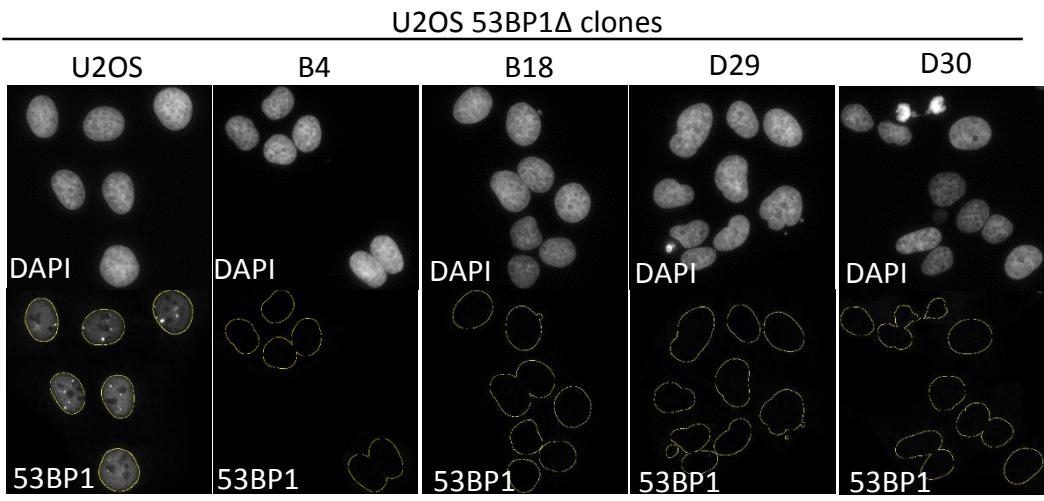

## g

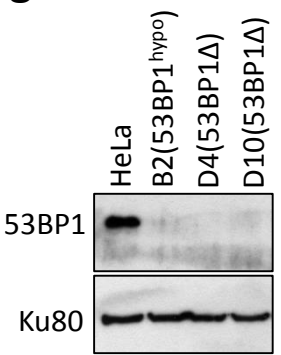

## h

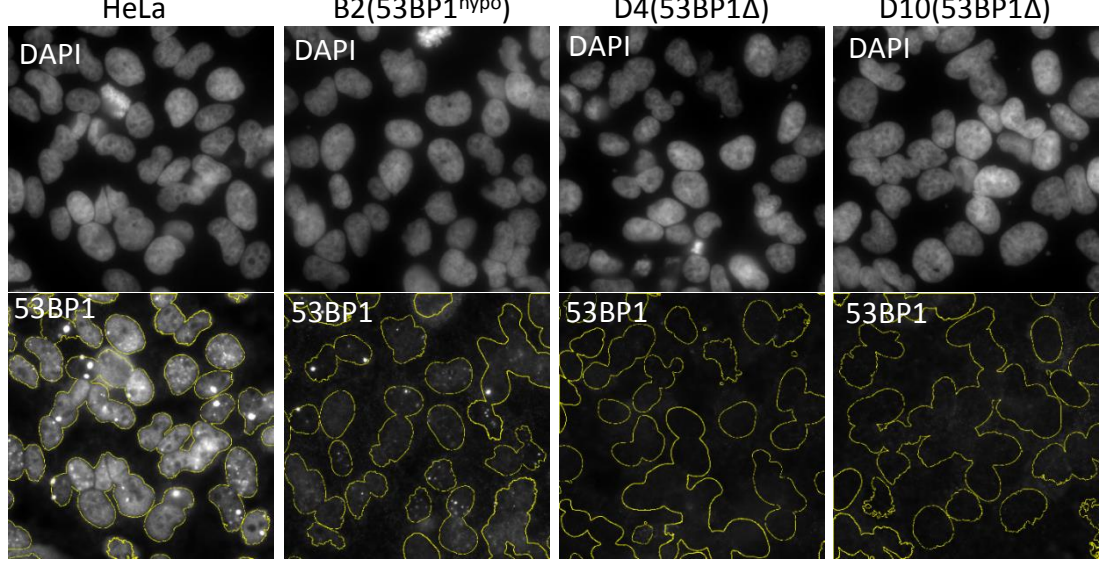

**Supplementary Figure 2. Verification of 53BP1<sup>hypo</sup> and 53BP1Δ clones in HeLa, RPE1 and U2OS cells by immunoblotting and immunofluorescence staining.**

- (a)** Residual expression of a full-length like 53BP1 protein in CRISPR/CAS9 knockout clones. **Left:** B2 (53BP1<sup>hypo</sup>) clone showing ~15% of 53BP1 levels as compared to HeLa. β-actin was used as a loading control. **Right:** Immunoblotting of 53BP1 protein levels in HeLa, 53BP1 non-targeted (b8, b23) and targeted clones (B2, b1, b9, b15). Ku80 was used as a loading control.
- (b)** Representative immunofluorescent images of HeLa 53BP1<sup>hypo</sup> clones (B2, b1, b9 and b15) showing small 53BP1 nuclear focal formation (arrows).
- (c)** Immunoblotting of 53BP1 proteins in 53BP1<sup>hypo</sup> and 53BP1Δ clones in RPE1 cells. Ku-80 was used as a loading control. Asterisk indicates a non-specific band.
- (d)** Representative immunofluorescent image of RPE1 B7 (53BP1<sup>hypo</sup>) clone showing small 53BP1 foci (arrows).
- (e)** Immunoblotting of 53BP1 protein in CRISPR/CAS9 clones of U2OS by targeting exon 2 (left) and exon 14 (right). Ku-80 was used as a loading control.
- (f)** Representative IF images of parental U2OS and U2OS 53BP1Δ clones (B4, B18, D29 and D30). Nuclei are outlined (yellow).
- (g)** Immunoblotting of 53BP1 protein in HeLa B2 (53BP1<sup>hypo</sup>) and D4 and D10 (53BP1Δ) cells. Ku-80 was used as a loading control.
- (h)** Representative IF images of HeLa 53BP1<sup>hypo</sup> (B2) and 53BP1Δ (D4 and D10) clones. Note the formation of weak and small 53BP1 nuclear foci in 53BP1<sup>hypo</sup> cells, but not in 53BP1Δ cells. Nuclei are outlined (yellow).

**Supplementary Figure 3**

**a** 53BP1 (EXON 2)

gRNA ↓ PAM

WT (0%) GCCTGAAAGCCAGGTTCTAGAGGATGATTCTGGTTTCTCACTTCAGTATGCT

Type I (47%) GCCTGAAAGCCA-----GGTTTCTCACTTCAGTATGCT

Type II (23%) GCCTGAA-----TTCTGGTTTCTCACTTCAGTATGCT

Type III (30%) GCCTGAAAGCCAGGTTCTAGAGGATGTGATTCTGGTTTCTCACTTCAGTATGCT

**b**

WT-allele specific primer →

WT sequence GCCTGAAAGCCAGGTTCTAGAGGATGATTCTGGTTTCTCACTTCAGTATGCT

Type III mutation CAGGTTCTAGAGGATGTGATTCTGGTTCTC

**c**

**Type I mutant product:**  
MPGEQMDPTGSQLDSDFSQQDTPCLIIEDSQPESQVLTSVCYLDTF LISRRTKKILCWMLCPILNKQ  
LEKNEETVIVGSMNI\*

**Type II mutant product:**  
MPGEQMDPTGSQLDSDFSQQDTPCLIIEDSQPEFWFSLQYAISTPS\*

**Type III mutant product:**  
MPGEQMDPTGSQLDSDFSQQDTPCLIIEDSQPESQVLEDVILVLT SVCYLDTF LISRRTKKILCWML  
CPILNKQLEKNEETVIVGSMNI\*

**d**

CRISPR mutation sites ↓ Alternative start site

Isoform 3 → Isoform 1 →

MPGEQM DPTGSQLDSDFSQQDTPCLIIEDSQPESQVLEDDSGSHFS M LSRHLPLNQLTHKENPVLDDVSNP

Santa Cruz 53BP1 antibody against 1-300 amino acids

EQTAGEEERGDGNSGFNEHLKENKVADPVDSSNLDTCGSISQVIEQLPQPNRTSSVLGMSVESAPAVEEEKGE  
ELEQKEKEKEEDTSGNTTHSLGAEDTASSQLGFGVLELSQSQDVEENTVPYEVDKEQLQSVTTNSGYTRLSD  
VDANTA IKHEEQSNEDIPIAEQSSKDIPVTAQPSKDVHVVKEQNPPARSEDMPPSPKASVAAMEAKEQLSAQ  
ELMESGLQIQKSPEPEVLSTQEDLFDQSNKTVSSDGCSTPSREEGGCSLASTPATTLLHLLQSGQRSLVQDLSL  
STNSSDLVAPSPDAFRSTPFIVPSSPTEQEGRQDKPMDT SVLSEEGGEPFQKKLQSGEPVELENPPLLPESTV  
SPQASTPISQSTPVFPGLSPLPSQPQFSHDIFIPSPSLEEQSNLDGKKGDMHSSSLTVECSKTSEIEPKNSPE  
DLGLSLTGDSCKLMLSTSEYSQSPKMESLSSHRIDEDGENTQIEDTEPMSPVLNSKFVPAENDSILMNPAQDG  
EVQLSQNDDKTGDDTDTRDDISILATGCKGREETVAEDVCIDLTCDSGSQAVPSPATRSEALSSVLDQEEAM  
EIKEHHPEEGSSGSEVEEIPETPCESQGEELKEENMESVPLHLSLTETQSQGLCLQKEMPKKCESEAMEVET  
SVISIDSPQKLAILDQELEHKEQEAWEFEATSSEDSSVIVDVKEPSRVDVSCEPLEGVEKCSDSQSWEDIAPEI  
EPCAENRLDTKEEKSVVEYEGDLKSGTAETEPVEQDSSQPSLPLVRADDPLRLDQELQQPQTQEKTSNSLTED  
SKMANAKQLSSDAEAQKLGKPSAHASQSFCESSSETPFHFTLPKEGDIIPLTGATPPLIGHLKLKLEPKRHSTPI  
GISNYPESTIATSDVMSESMVETHDPILGSGKGDGSAAPDVKLCLRMKLVSPETEASEESLQFNLEKPATG  
ERKNGSTAVAESVASPQKTMVLSVICEARQENEARSEDPTTPIRGNLLHFPSSQGEEKEKLEGDHTIRQS  
QQPMKPISPVKDPVSPASQKMIQGPSSPQGEAMVTDVLEDQKEGRSTNKENPSKALIERPSQNNIGIQTME  
CSLRVPETVSAATQTIKNVCEQGTSTVDQNFQKQDATVQTERGSGEKVPSAPGDDTESLHSQGEFEEDMPQ  
PPHGHVLRHMRITIREVRTLVTRVITDYYVDGTEVERKVTEETEEPIVEQCETEVSPSQTGGSSGDLGDI  
SSFSSKASSLHRTSSGTSLSAMHSSGSSGKAGPLRGKTSGETPADFALPSSRGGPGKLSRKGVSQTGTP  
VCEEDGDAGLGIRQGGKAPVTPRGRGRRGRPPSRTTGTRETAVPGPLGIEDISPNLSPDDKSFSRVVPVDP  
STRRTDVGAGALRRSDSPEIPFQAAAGPSDGLDASSPGNFSVGLRVVAKWSSNGFYFSGKITRDVGAGKYKL  
LFDDGYECDVLGKDILLCDPIPLDTEVTALSEDEYFSAGVVKGHRKESGELYYSIEKEGQRKWKYKRMAVILSLE  
QGNRLREQLGDPYEAVTPLTKAADISLDNLVEGKRKRNSVSSPATPTASSSSSTTPTRKITESPRASMGVL  
SGKRKLITSEERSPAKRGRKSA TVKPVGAGEFVSPCESGDNTGEPSEALEEQRGLPLNKLTLFLGYAFLLTMA  
TTSDKLASRSKLPDGPTGSSEEEEEFEIIPPFNKQYTESQLRAGAGYILEDFNEAQCNTAYQCLLIADQHCRT  
KYFLCLASGIPCVSHVWVHDSCHANQLQNYRNYLLPAGYSLEEQRILDWQPRENPFQNLKVVLLVSDQQNFL  
ELWSEILMTGGAASVKQHSSAHNKDIALGVFDVVVTPDSCPASVLKCAEALQLPVVSQEWVIQCLIVGERIGF  
KQHPKYKHDYVSH\*

Abcam 53BP1 antibody against 390-900 amino acids

### **Supplementary Figure 3. DNA sequence analyses of 53BP1 hypomorphic allele.**

**(a)** Sequence of the sgRNA highlighted in red used to generate 53BP1 hypomorphic cells (53BP1<sup>hypo</sup>). Arrow indicates the CRISPR/CAS9 cleavage site. Sanger sequencing result, following TA-cloning, of 40 individual plasmids identified three different types of mutations in 53BP1 exon 2 in HeLa B2 clone.

**(b)** No wildtype (WT) 53BP1 exon 2 sequence was recovered after WT allele-specific PCR amplification. A primer annealing only to wildtype exon 2 sequence was designed to PCR amplify any remaining WT allele after CRISPR/CAS9 gene editing. Chromatogram of DNA sequence obtained by wildtype (WT) allele-specific PCR amplification showing only type III mutation (2 bases insertion) without any mixed reads of WT sequences.

**(c)** Translations of the mutant alleles generating premature termination peptides. All the mutations lead to a premature STOP codon.

**(d)** A potential hypomorphic 53BP1 isoform translated from methionine 47. Known 53BP1 isoforms 1 and 3 from UniProt database were depicted. Antibodies against the first 300 residues, plus from residues 390-900 of 53BP1 were shown on the right.



**Supplementary Figure 4**

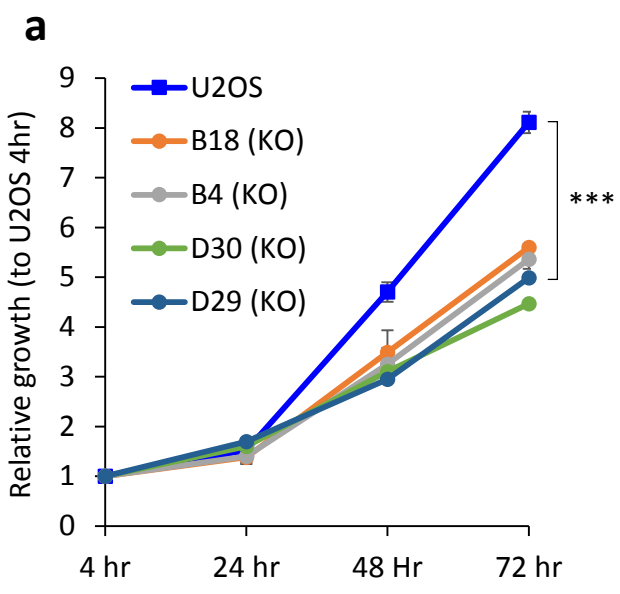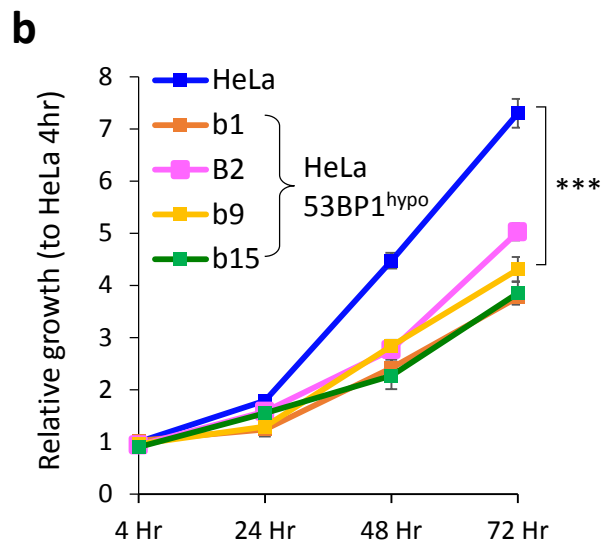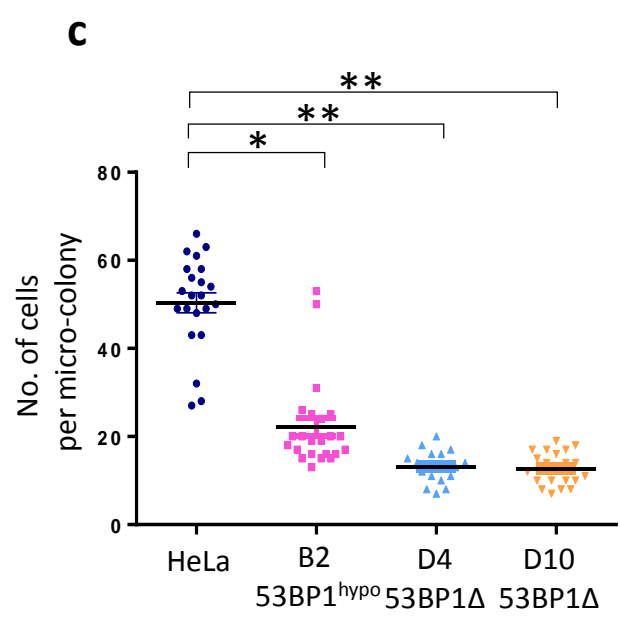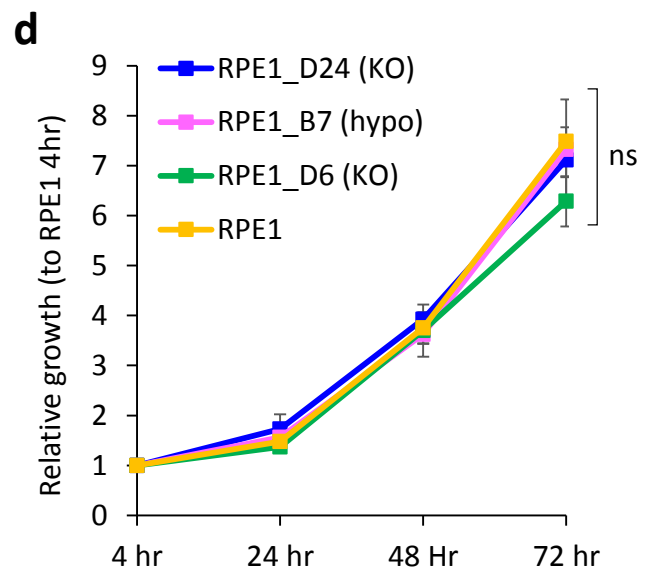

Micro-colony assay (7-day)

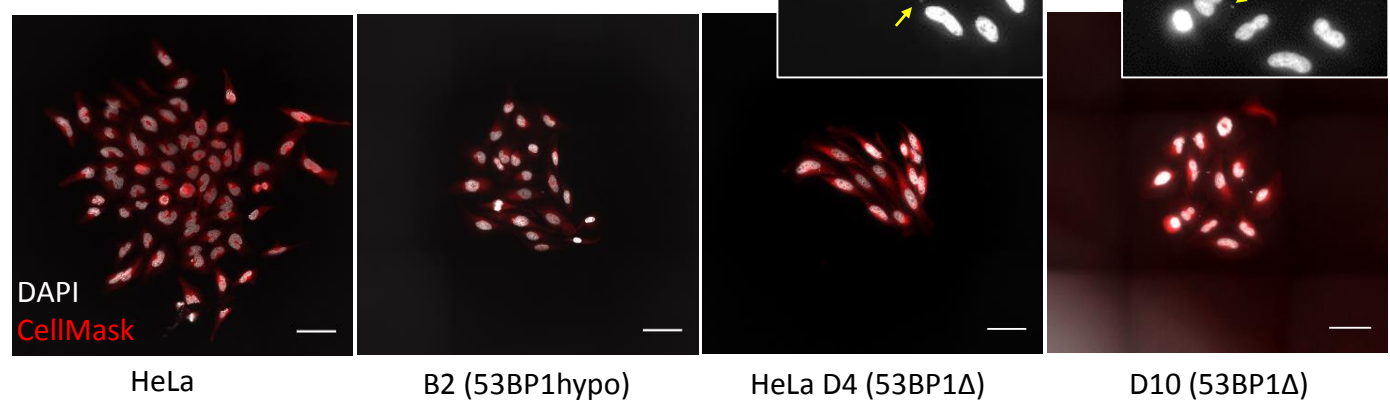



**Supplementary Figure 4. 53BP1 $\Delta$  and 53BP1<sup>hypo</sup> cancer cells show increased proliferation defects.**

**(a)** Growth curves of U2OS and U2OS 53BP1 $\Delta$  clones (B18, B4, D30, D29) determined by MTT assays. Error bars represent s.d of three independent experiments. Statistical significance was determined by two-way ANOVA (\*\* $p < 0.005$ ).

**(b)** Growth curves of HeLa and HeLa 53BP1<sup>hypo</sup> clones (b1, B2, b9 and b15) determined by MTT assays. Other details as **(a)**.

**(c)** Micro-colony growth assay showing severe proliferation defects in HeLa 53BP1 $\Delta$  cells. HeLa, B2 (53BP1<sup>hypo</sup>), D4 and D10 (53BP1 $\Delta$ ) cells were seeded onto cover glass in limited dilution and allowed to form micro-colonies. Number of cells in each single, well-separated colony was counted after 7 days. Cells in over 20 micro-colonies in each cell line were counted (**top**). Images showing micro-colonies of HeLa, B2 (53BP1<sup>hypo</sup>), D4 and D10 (53BP1 $\Delta$ ) cells stained with DAPI (grey) and cell mask dye (red) (**bottom**). Note, more severe cell growth defects present in HeLa 53BP1 $\Delta$  clones. Statistical significance was determined by T-test (\*,  $p < 0.05$ ; \*\*,  $p < 0.01$ ).

**(d)** Growth curves of RPE1, B7 (53BP1<sup>hypo</sup>), D6 and D24 (53BP1 $\Delta$ ) clones determined by MTT assays. Other details as **(a)** (ns: non-significant).

# Supplementary Figure 5

**a**

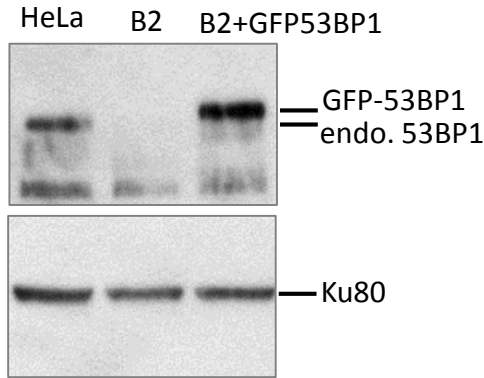

**b**

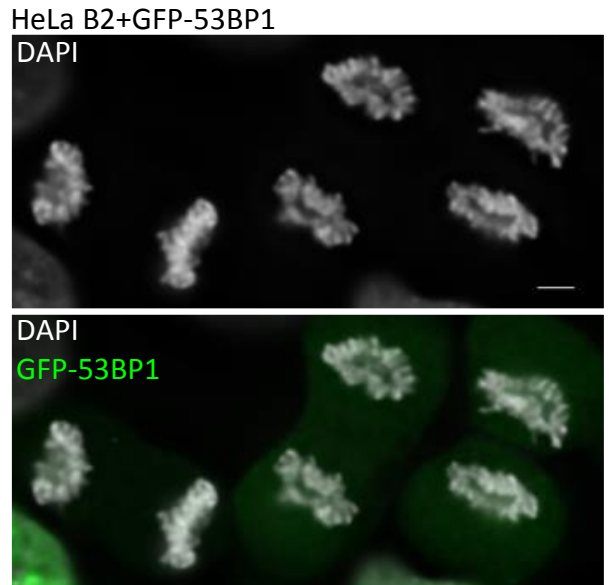

**c**

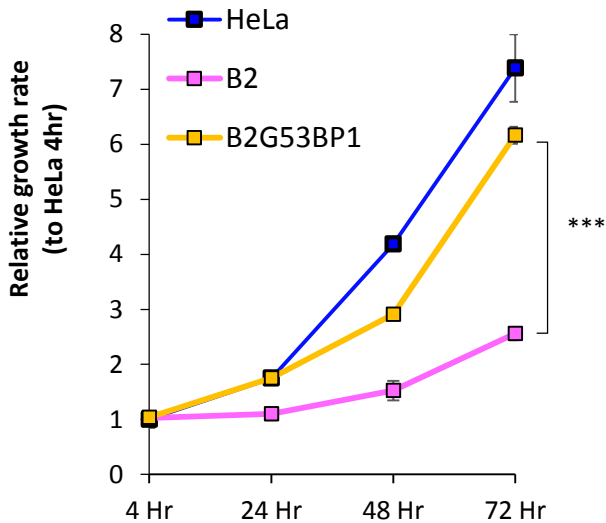

**d**

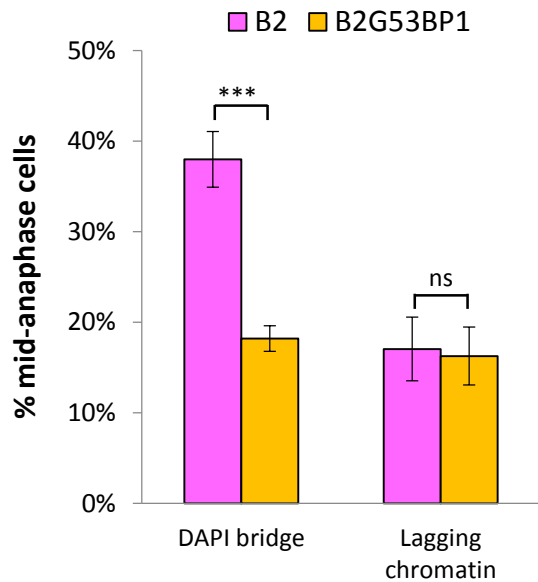

## Supplementary Figure 5. Ectopic overexpression of EGFP-tagged 53BP1 in HeLa 53BP1<sup>hyppo</sup> cells rescues slow growth and chromosome missegregation phenotypes.

**(a)** Generation of stable HeLa B2 (53BP1<sup>hyppo</sup>) cells ectopically overexpressing an EGFP-tagged full-length 53BP1. Immunoblotting showing marginal overexpression of the EGFP-53BP1 in HeLa B2 (53BP1<sup>hyppo</sup>) cells (B2G53BP1). Ku80 was used as a loading control.

**(b)** Representative images of HeLa B2G53BP1 anaphase cells in the same field showing normal complete chromosome disjunction. Scale bars, 5  $\mu$ m.

**(c)** Ectopic expression of EGFP-53BP1 partially rescued the slow growth phenotype in B2(53BP1<sup>hyppo</sup>) cells. Growth curves of HeLa, B2 (53BP1<sup>hyppo</sup>) and B2G53BP1 (B2+EGFP-53BP1) determined by MTT assays. Error bars represent s.d. of three independent experiments. Statistical significance was determined by two-way ANOVA (\*\*\* $p < 0.005$ ).

**(d)** Ectopic expression of EGFP-53BP1 reduced anaphase bridge formation in HeLa B2 (53BP1<sup>hyppo</sup>) cells. A graph showing the percentages of anaphase cells with chromatin bridges and lagging chromatin. Total numbers of anaphase cells counted: B2=352, B2G53BP1=310 from 3 separate preparations. Error bars represent s.d. Note: Percentages of B2 and B2G53BP1 cells having lagging chromatin are similar, see Fig. 5g-h for explanation). Statistical significance was determined by T-test (\*\*\*,  $p < 0.001$ ; ns, nonsignificant).

# Supplementary Figure 6

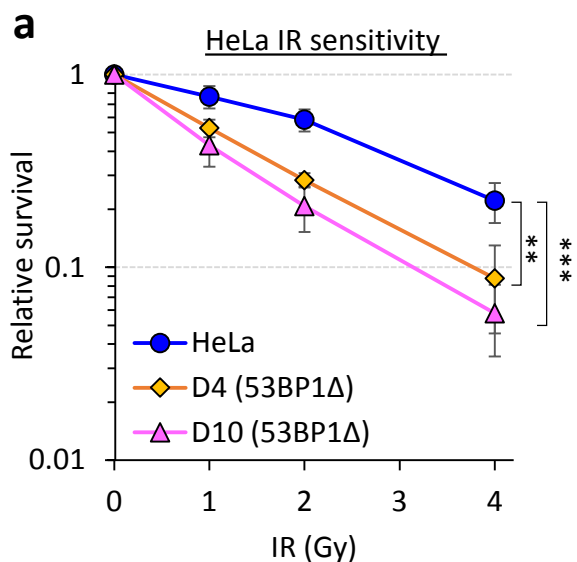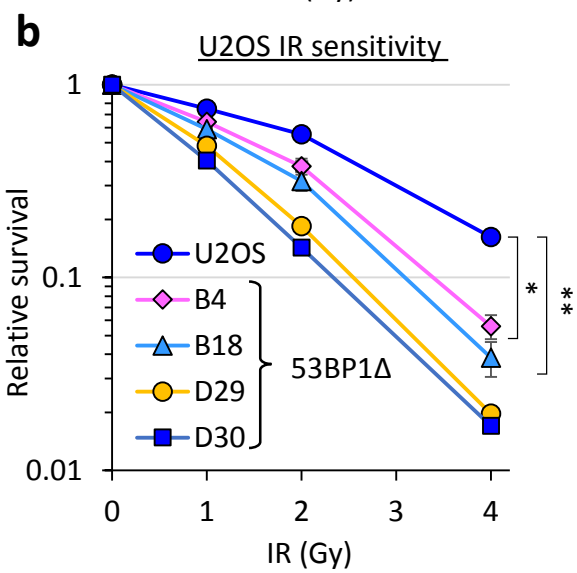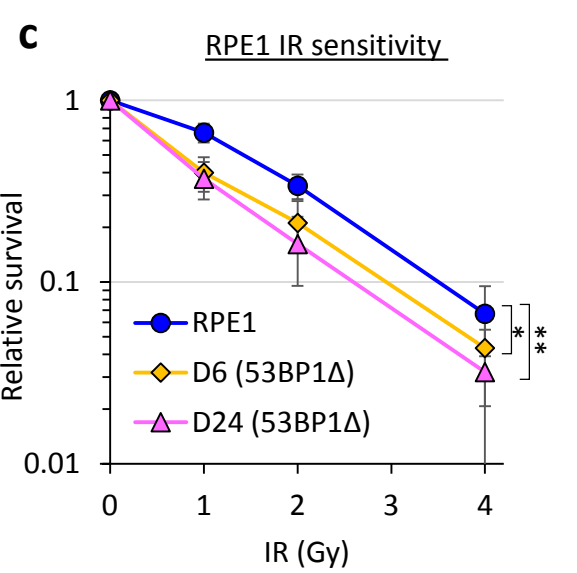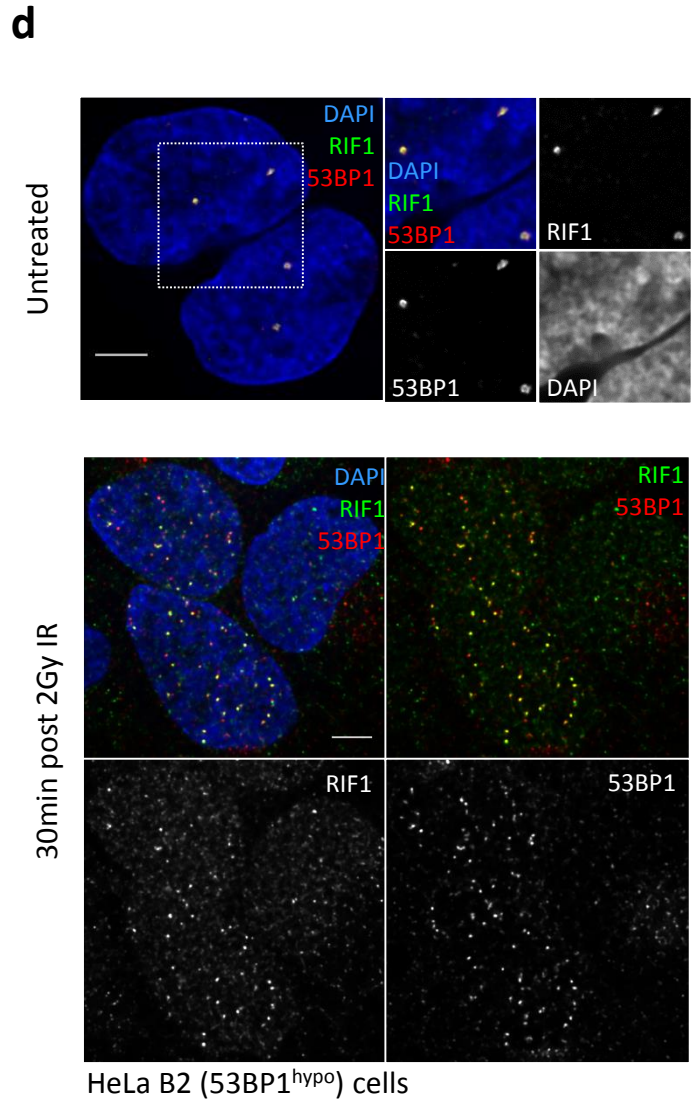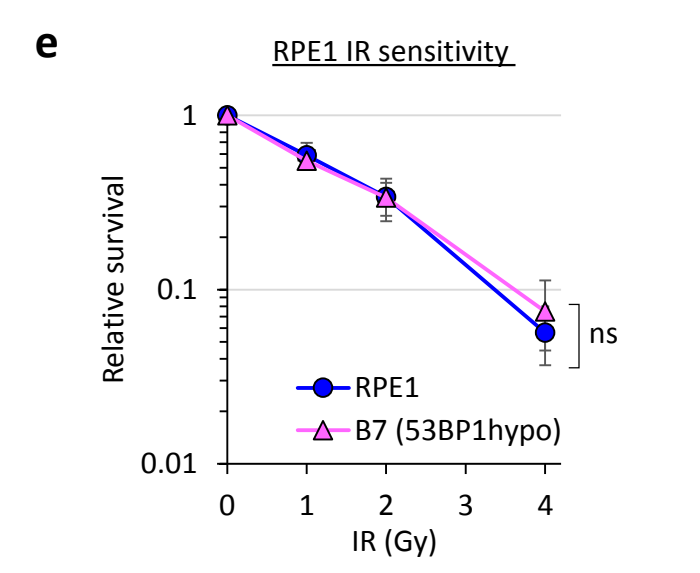

**Supplementary Figure 6. Increased IR sensitivities in 53BP1 complete knockout, but not 53BP1<sup>hypo</sup>, cells.** Relative survival curves after indicated doses of IR treatments in HeLa 53BP1Δ (a), U2OS 53BP1Δ (b), and RPE1 53BP1Δ (c) clones. (d) Co-localisation of RIF1 (green) and 53BP1 (red) in untreated (top) and IR-treated (bottom) HeLa B2 (53BP1<sup>hypo</sup>) cells. (e) Relative survival curves after indicated doses of IR treatments in RPE1 53BP1<sup>hypo</sup> cells. Error bars represent s.d. from three independent experiments. Statistical significance was determined by two-way ANOVA. (\*p<0.05, \*\*p<0.01, \*\*\*p<0.005, ns: non-significant).

# Supplementary Figure 7

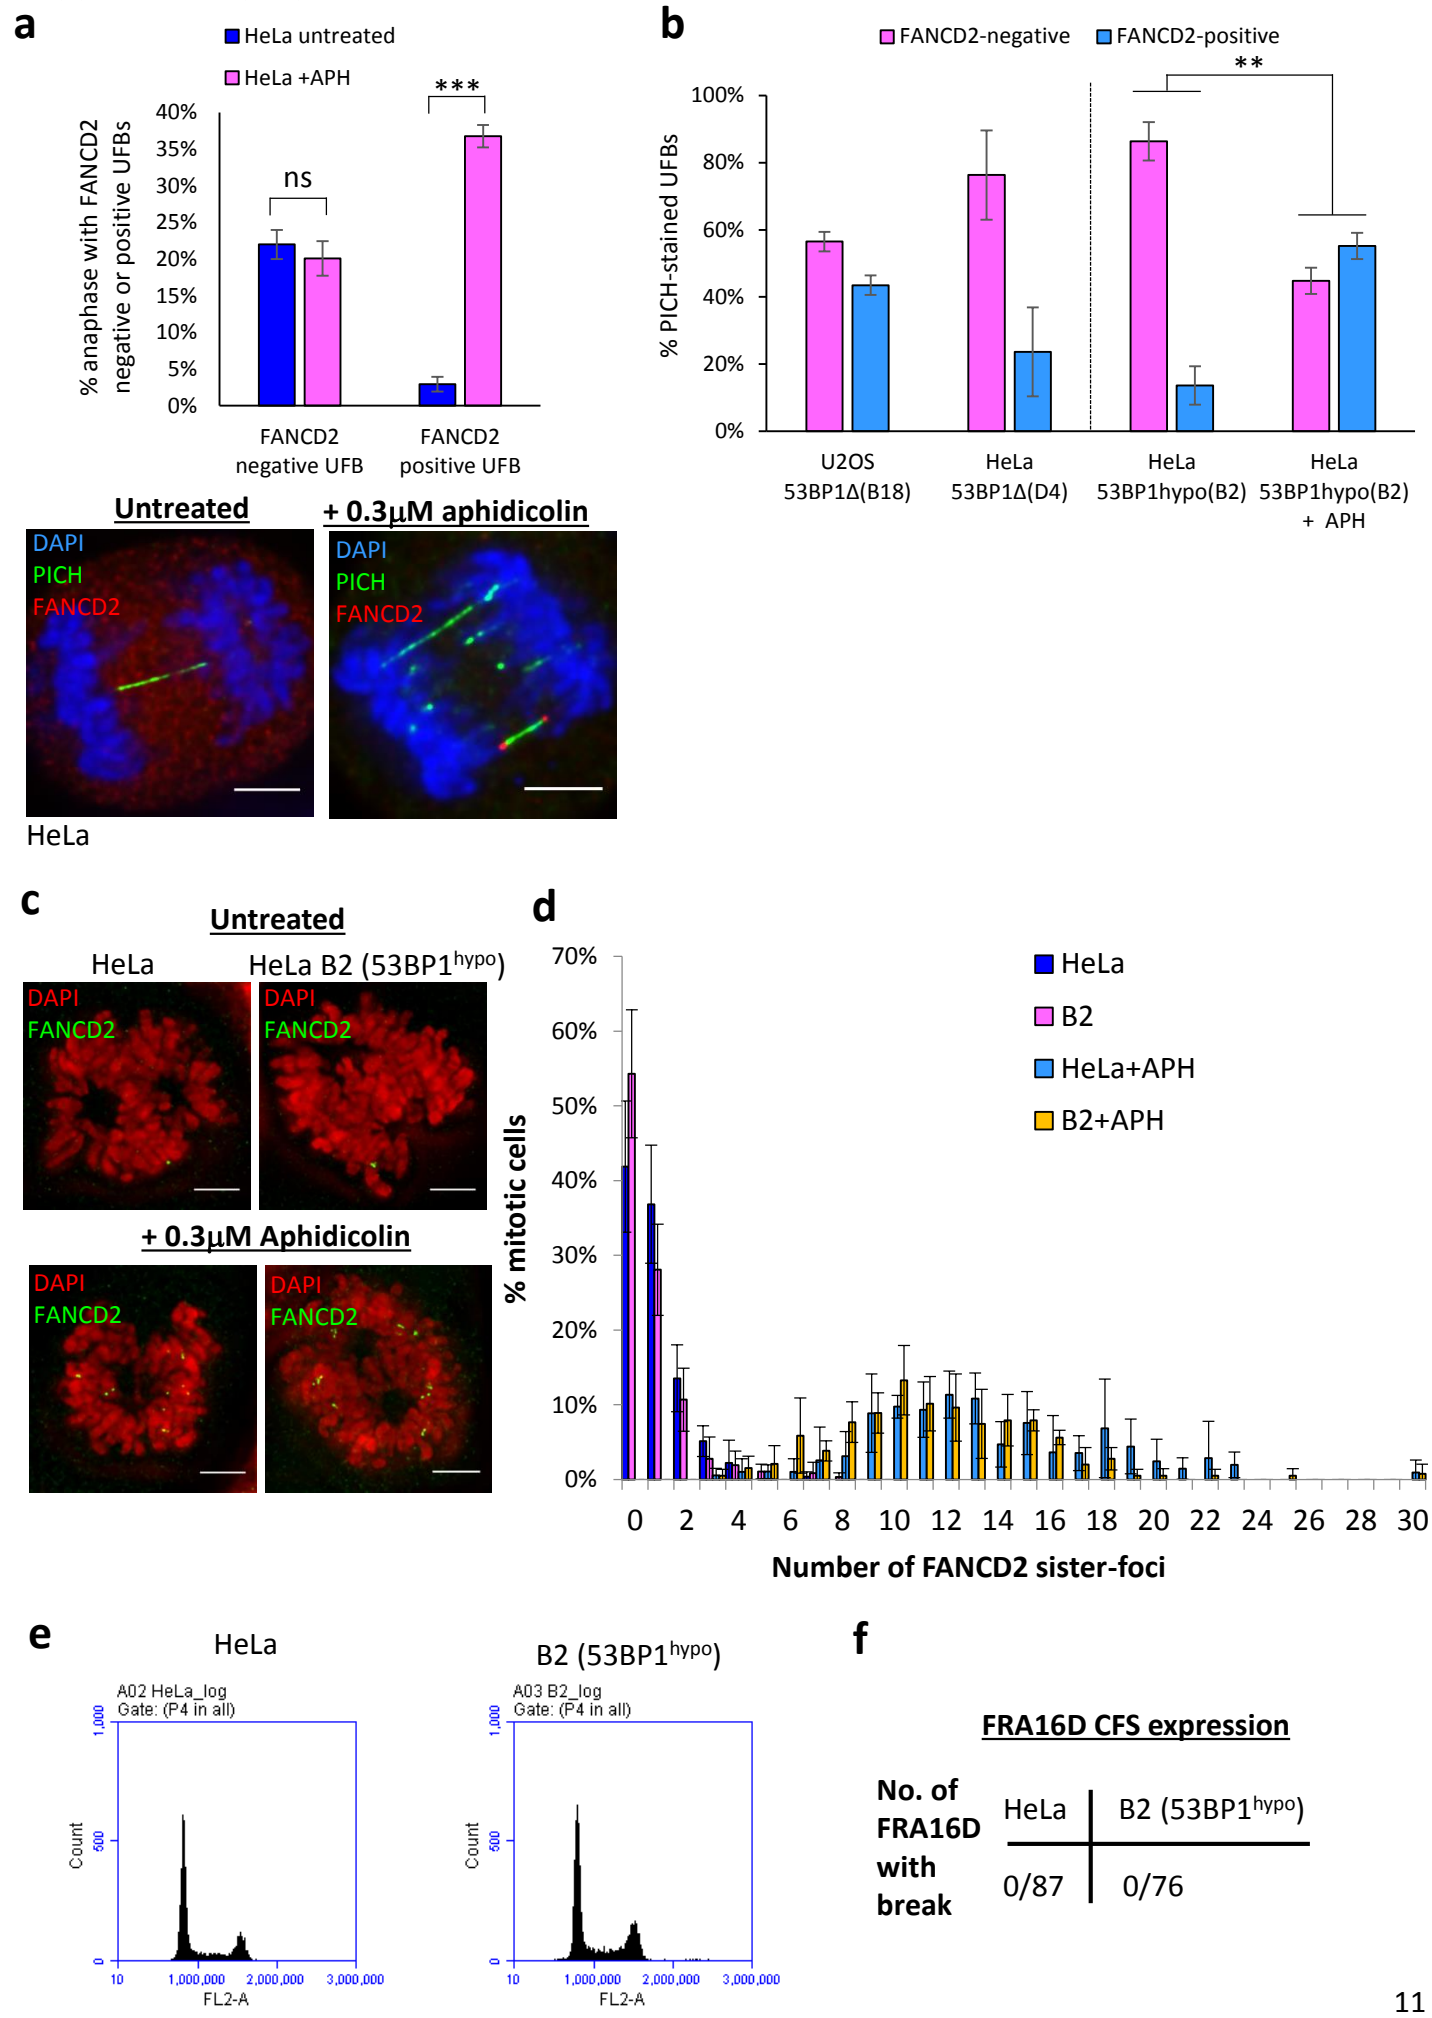

**Supplementary Figure 7. Fanconi anemia pathway is proficient in 53BP1-depleted cells in response to aphidicolin-induced replication stress**

HeLa B2 (53BP1<sup>hypo</sup>) cells did not show increased levels of spontaneous FANCD2 mitotic foci but responded to low dose aphidicolin treatment for the formation of FANCD2 mitotic foci.

**(a)** A low dose of aphidicolin treatment [0.3 $\mu$ M] significantly increased the frequency of FANCD2 positive, but not FANCD2 negative, UFBs in HeLa anaphase cells. Numbers of anaphase cells counted: HeLa untreated=135, HeLa+APH=120 from 3 independent experiments. Representative images are shown below. Scale bars, 5  $\mu$ m. Statistical significance was determined by T-test (\*\*p<0.001).

**(b)** Quantitation of PICH-UFBs positive and negative for FANCD2 in U2OS 53BP1 $\Delta$  (B18), HeLa 53BP1 $\Delta$  (D4) and HeLa 53BP1<sup>hypo</sup> (B2). Mid-anaphase cells were examined either treated or not treated with 0.3 $\mu$ M aphidicolin for 16hr. Note, a majority of PICH-UFB stained negative for FANCD2 in 53BP1 depleted cells. Over 100 PICH-UFBs were scored from 3 independent experiments. Statistical significance was determined by T-test (\*\*p<0.01).

**(c)** Z-projection high-resolution images of FANCD2 focal formation in HeLa and B2 (53BP1<sup>hypo</sup>) pro-metaphase cells, with and without aphidicolin treatments. Scale bars, 5  $\mu$ m.

**(d)** Frequencies of mitotic cells with FANCD2 sister foci in untreated, or aphidicolin-treated conditions, in both HeLa and B2 (53BP1<sup>hypo</sup>) populations. Total numbers of mitotic cells counted: HeLa=227, B2=215, HeLa+APH=179, B2+APH=174. Error bars represent s.d of three independent experiments.

**(e)** Cell cycle profiles of exponentially growing HeLa and B2 (53BP1<sup>hypo</sup>) cells.

**(f)** A table illustrating FRA16D common fragile site (CFS) expression in HeLa and B2 (53BP1<sup>hypo</sup>) chromosomes. FISH was performed by using BAC-264L1 probe hybridising FRA16D site.

**Supplementary Figure 8**

**a**

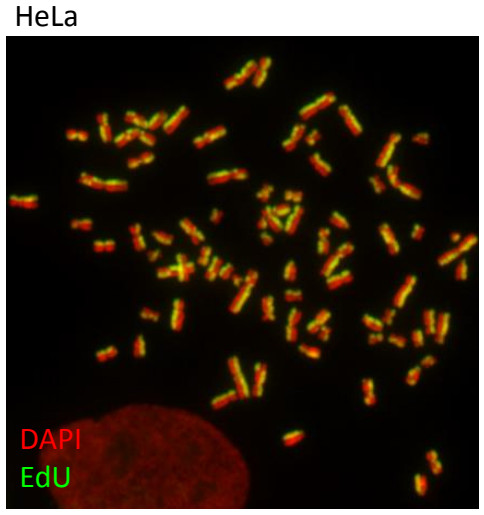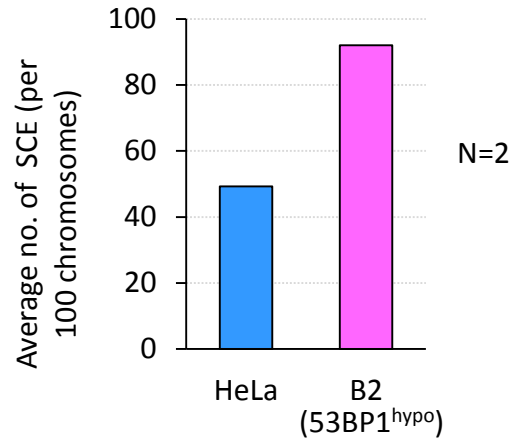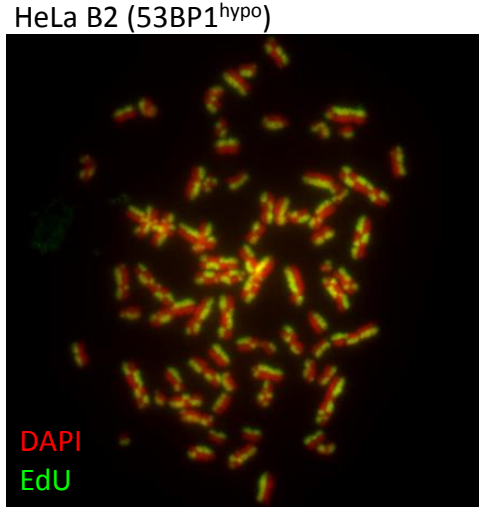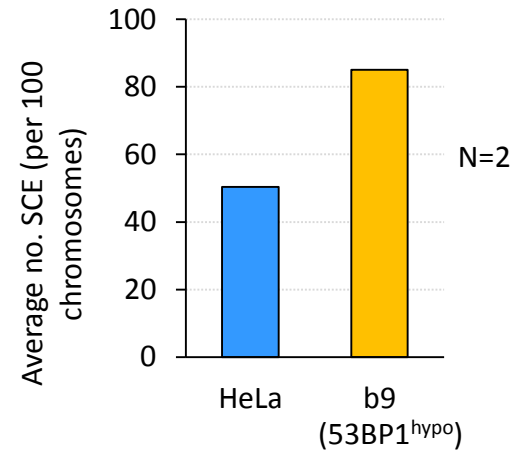

**b**

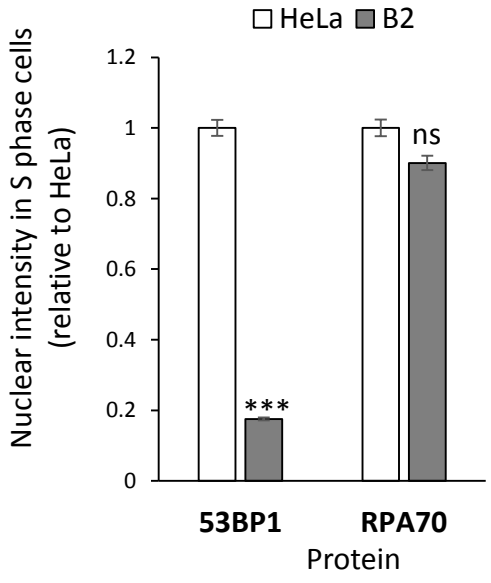

Co-culture of HeLa and B2 (53BP1<sup>hypo</sup>) cells

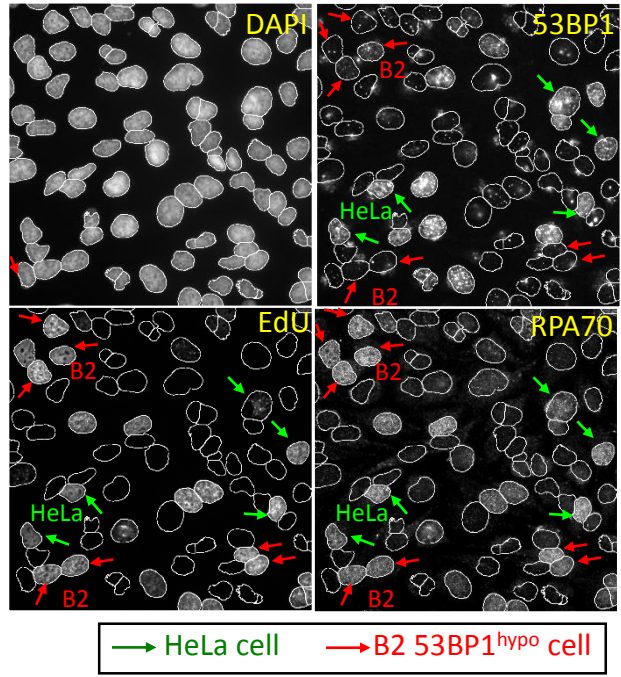

**Supplementary Figure 8. 53BP1 hypomorphic cells display increased rates of sister chromatid exchange (SCE).** (a) Sister chromatids were differentially labelled by using EdU (green) in HeLa, B2 and b9 (53BP1<sup>hypo</sup>) cells. Graphs showing quantitation of average SCE rates in HeLa, B2 and b9 (53BP1<sup>hypo</sup>) cells (right). Over 2000 chromosomes were scored from 2 independent experiments. Representative metaphase spreads showing SCEs in HeLa and B2 53BP1<sup>hypo</sup> cells are shown (left).

**(b)** Nuclear intensities of 53BP1 and RPA70 protein in HeLa and B2 (53BP1<sup>hypo</sup>) S-phase cells (left). HeLa and B2 (53BP1<sup>hypo</sup>) cells were mixed and seeded together on the same coverglasses. Co-cultured cells were pulsed labelled with EdU for 15min and then pre-extracted before subjecting to IF staining. Using ScanR imaging analysis, B2 (53BP1<sup>hypo</sup>) population (red arrow) were separated from HeLa (green arrow) based on 53BP1 expression intensities (a 5-fold difference). S-phase cells were selected based on the presence of EdU signal. RPA intensities were compared in the sorted S-phase populations of HeLa and B2 (53BP1<sup>hypo</sup>) cells. Right: representative images of the co-cultured HeLa and B2 (53BP1<sup>hypo</sup>) cells stained with EdU, 53BP1 and RPA. Nuclei were outlined based on DAPI staining. HeLa (n=288) and B2 (n=438) EdU +ve cells were measured. Error bars represent s.e.m. Statistical significance was determined by T-test (\*\* $p < 0.001$ ; ns, nonsignificant).



# Supplementary Figure 9

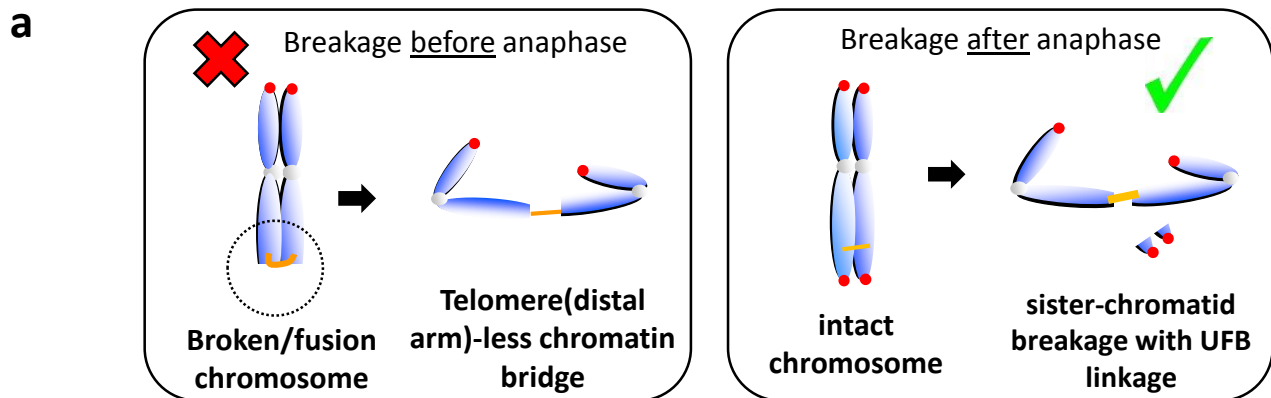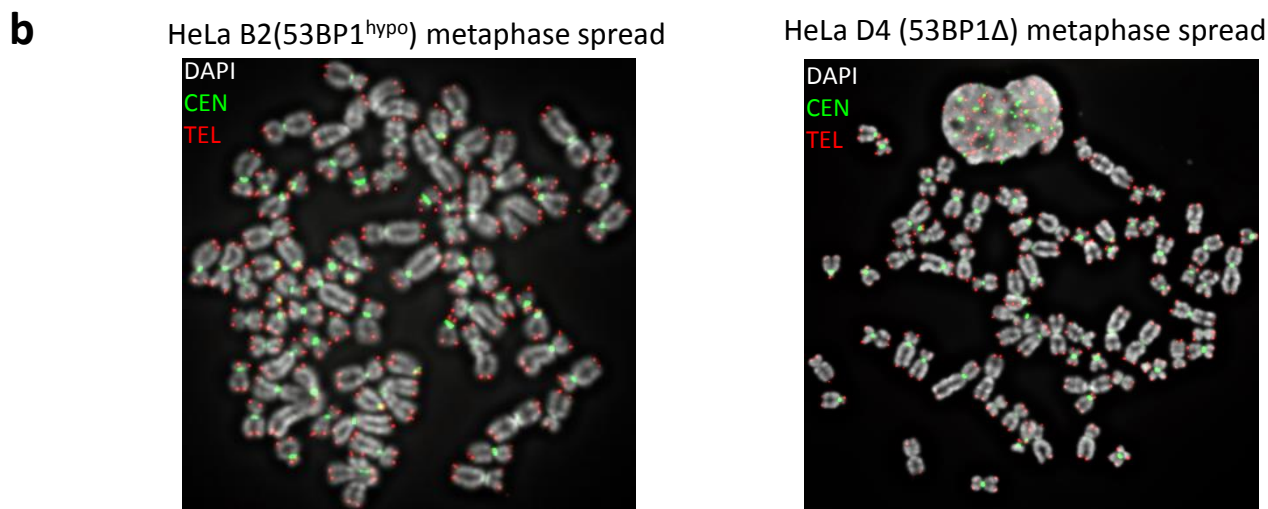

Sister-chromatid fusion

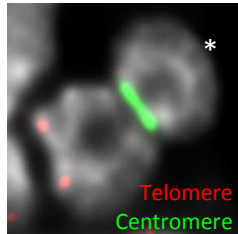

| HeLa B2(53BP1 <sup>hypo</sup> ) | Broken/fusion chromosome |
|---------------------------------|--------------------------|
| % metaphase spread              | 2.3±2% (2/84)            |
| % chromosome                    | 0.03±0.03% (2/6284)      |
| HeLa D4 (53BP1Δ)                | Broken/fusion chromosome |
| % metaphase spread              | 2.44±2.14% (4/88)        |
| % chromosome                    | 0.06±0.02% (4/6539)      |

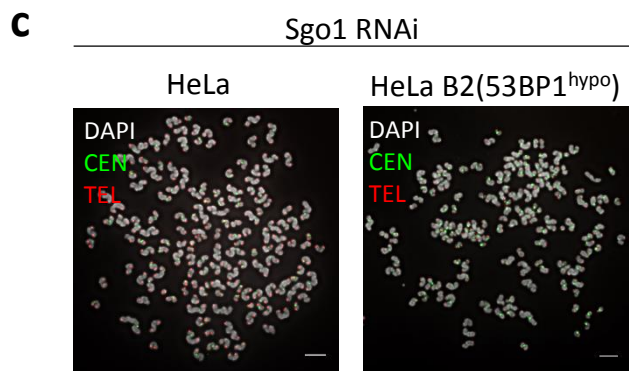

Non-intact chromatid

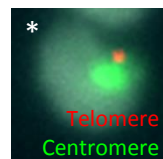

|                    | Non-intact chromatid                       |
|--------------------|--------------------------------------------|
| % metaphase spread | HeLa: 10% (2/20)<br>B2: 15% (3/20)         |
| % chromosome       | HeLa: 0.06% (2/3262)<br>B2: 0.16% (5/3168) |

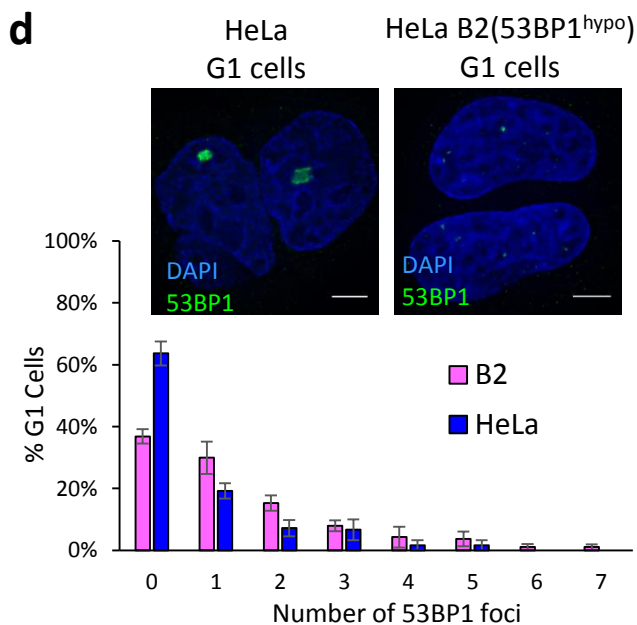

**Supplementary Figure 9. 53BP1 depletion does not cause chromosomal breakage before anaphase, but lead to increased DNA damage in G1 population**

**(a)** Two models depicting the generation of telomere/arm-less chromatin bridges in anaphase caused by sister-chromatid arm fusions (**Left**) or sister-chromatid rupture (**Right**).

**(b)** Quantitation of metaphase chromosomes with sister-chromatid arm fusion or arm breakage in HeLa B2 (53BP1<sup>hypo</sup>) & D4 (53BP1 $\Delta$ ) mitotic cells. Representative FISH image showing metaphase chromosomes of HeLa B2 (53BP1<sup>hypo</sup>) and D4 (53BP1 $\Delta$ ) labelling with centromere (green) and telomere (red) PNA probes. Note: all chromosomes contain a single centromere and two flanking sister telomeres. Inset demonstrating a rare example of a chromosome with sister-arm fusion: missing one telomere end (asterisk). A table illustrating the frequencies of metaphase spreads and chromosomes with sister-arm fusion events in HeLa B2 (53BP1<sup>hypo</sup>) & D4 (53BP1 $\Delta$ ) mitotic cells. Over 6000 chromosomes from 88 metaphase spreads were counted in 3 independent experiments.

**(c)** Quantitation of single sister chromatid showing chromatid breakages in HeLa and 53BP1<sup>hypo</sup> cells after knockdown of Sgo1 to induce premature sister chromatid separation. Over 3000 chromosomes from 20 metaphase spreads. Inset demonstrating an example of a non-intact chromatid with missing one telomere end (asterisk).

**(d)** 53BP1 nuclear body or foci were scored in HeLa and 53BP1<sup>hypo</sup> G1 cells. EdU pulse-labelling and CENPF were used as markers to identified S and G2 phase cells. 53BP1 foci were scored in G1 cells (absence of both above signals). Over 200 cells were counted in 3 independent experiments. Error bars represent s.d.

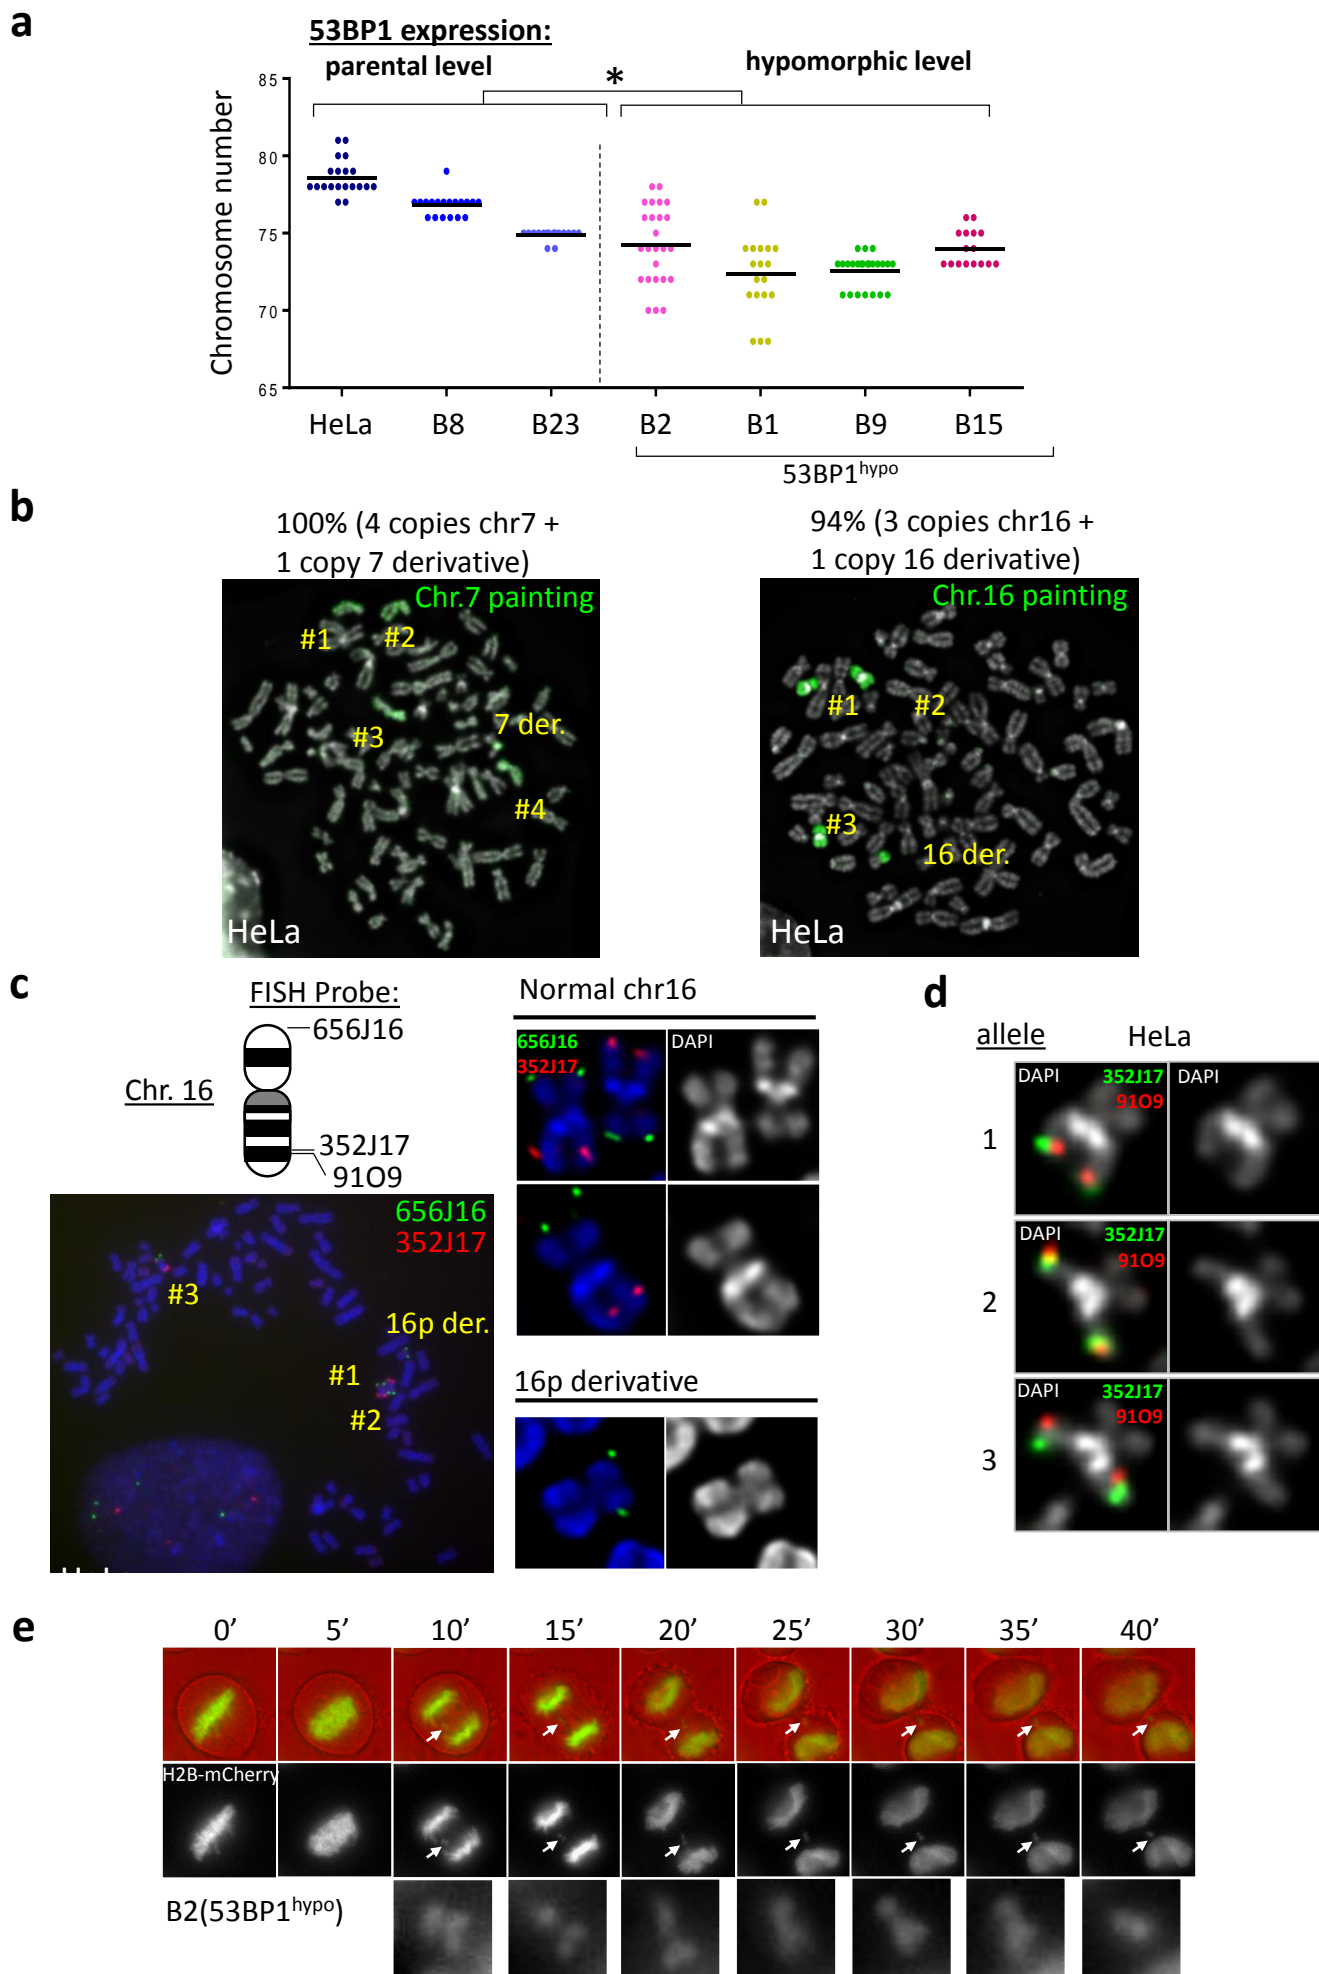

**Supplementary Figure 10. HR-mediated sister chromatid bridging leads to numerical chromosomal rearrangements in 53BP1-depleted cancer cells.**

**(a)** Numerical chromosome instability after 53BP1-depletion in HeLa cells. Note a decrease in the number of chromosomes in hypomorphic 53BP1 clones. 22 metaphase spreads from each cell line were scored. Statistical significance was determined by T-test (\*,  $p < 0.05$ ).

**(b)** Whole chromosome painting on chromosomes 7 and 16 was performed on metaphase spreads of HeLa cells. Four intact chromosome 7 plus a 7 derivative (7 der.) (100%) and three (94%), or two (6%) intact chromosome 16, plus a 16p derivative (16p der.) were found throughout the HeLa populations.

**(c)** Ideogram of chromosome 16 marking the positions of FISH BAC clones used. Dual-colour fluorescence in situ hybridization (FISH) was performed on metaphase spreads of HeLa cells. Three, or two intact chromosome 16, plus a 16p derivative (16p der.) were found throughout the HeLa population. **Right:** enlarged views of three intact copies of chr.16 and the 16p derivative in HeLa cells.

**(d)** HeLa metaphase chromosomes 16 display a normal FISH hybridisation pattern using two probes against FRA16D CFS (compared to Fig. 7b-c).

**(e)** Live-cell imaging of a HeLa B2 (53BP1<sup>hypo</sup>) cell stably expressing H2B-mCherry progressing through mitosis. A lagging-chromatin pair (arrow) fails to disjoin and co-segregate to the same daughter offspring cell. Insets showed the enlarged images of the chromatin pair.

**Supplementary Figure 11**

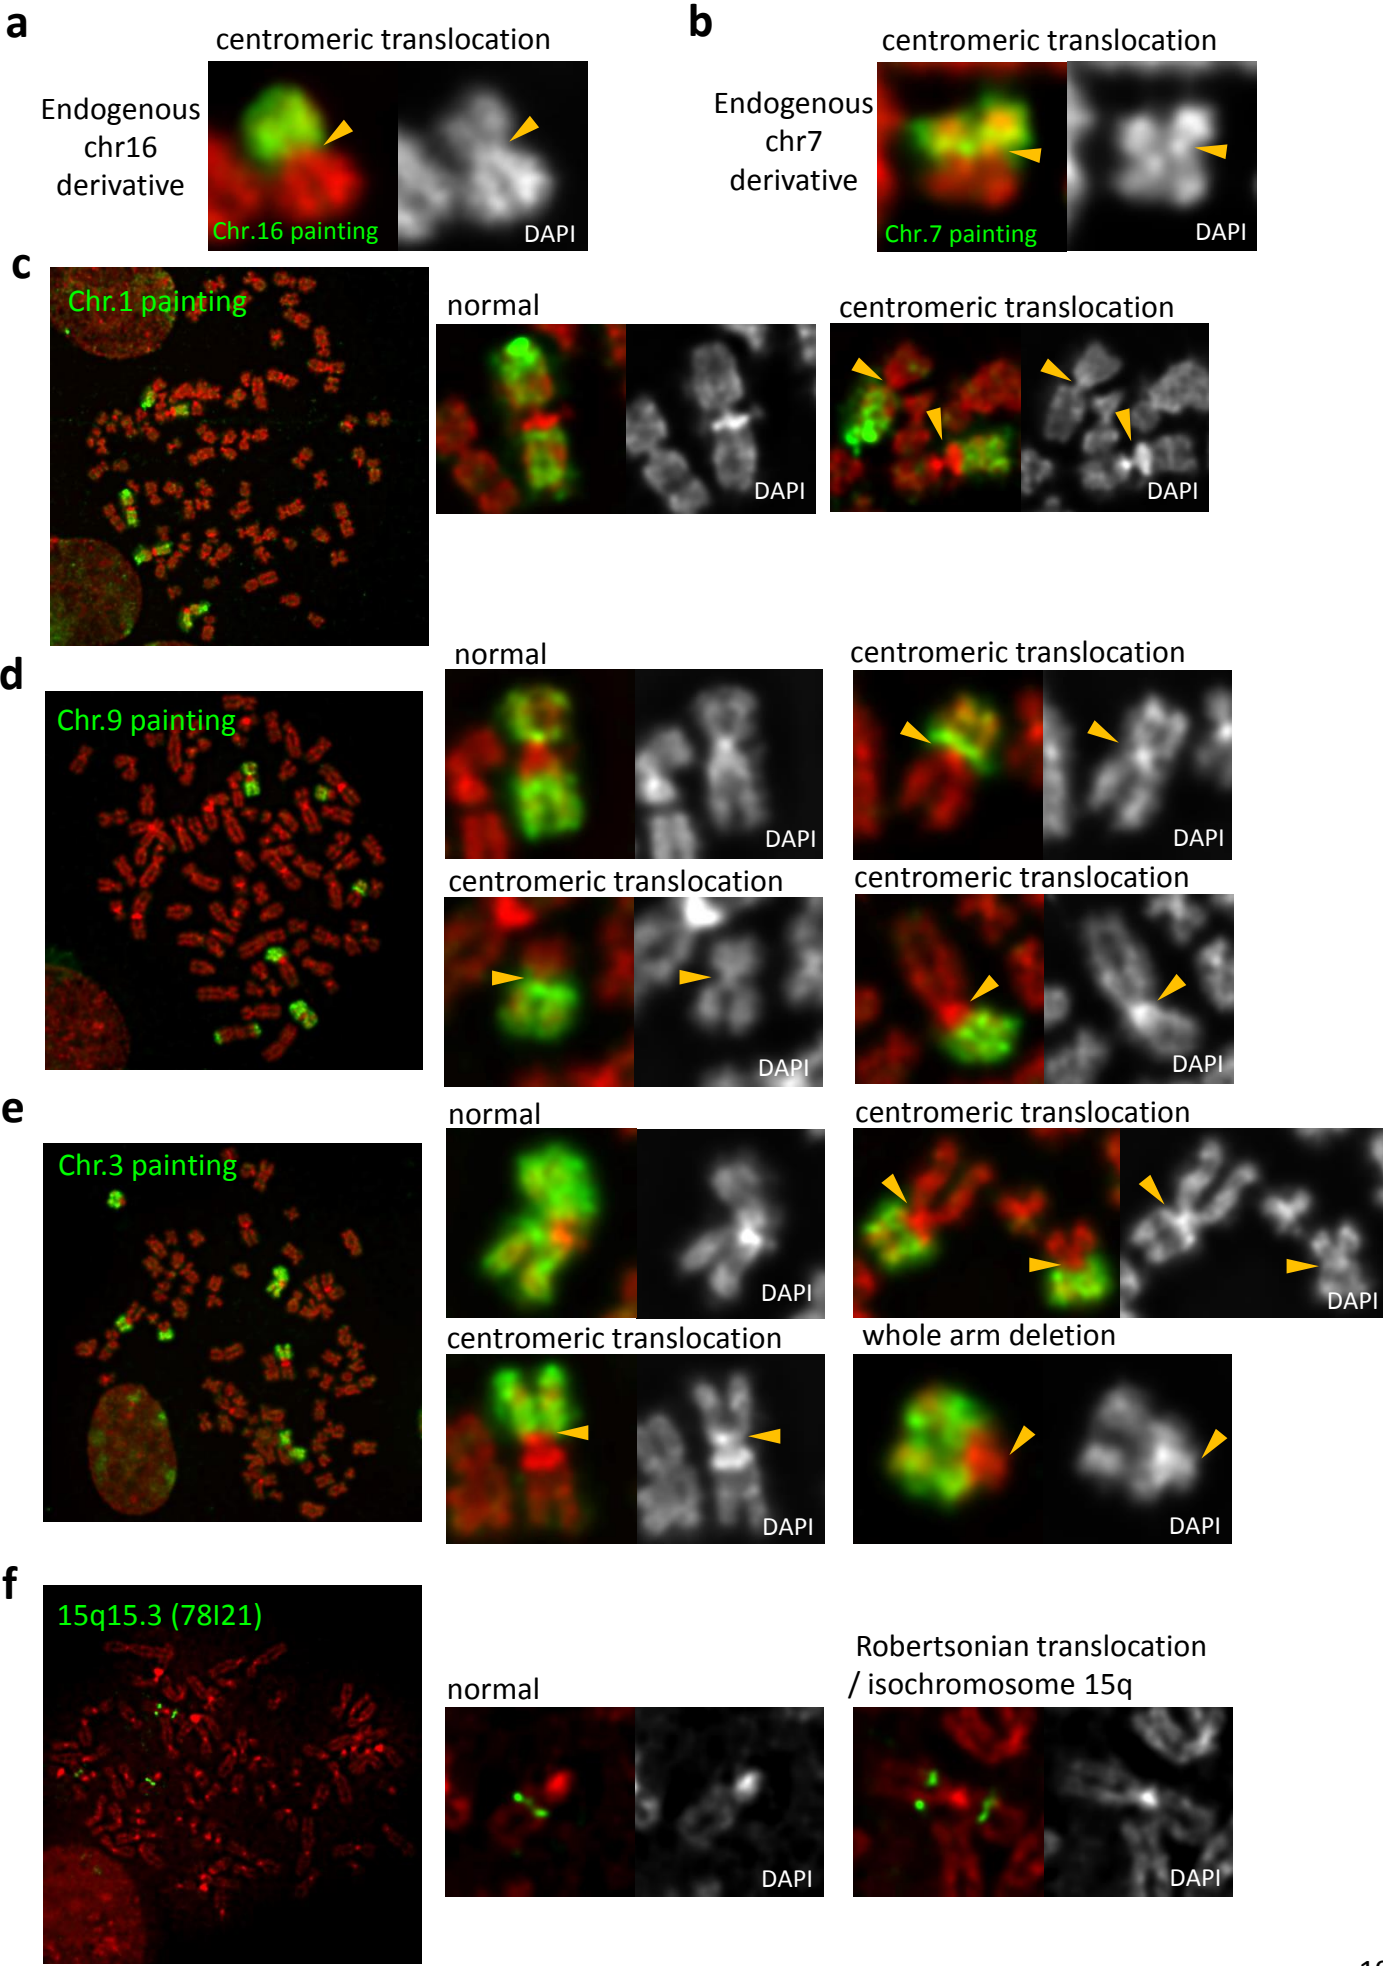

**Supplementary Figure 11. HeLa genome harbours marker chromosomes of Robertsonian (-like) translocations.**

**(a)** Whole chromosome 16 painting (green) shows centromere translocation involving chr16.

**(b)** Whole chromosome 7 painting (green) shows centromere translocation involving chr7.

**(c)** Whole chromosome 1 painting (green) reveals two marker chromosomes with centromere translocations involving chr1.

**(d)** Whole chromosome 9 painting (green) reveals three marker chromosomes with centromere translocations involving chr9.

**(e)** Whole chromosome 3 painting (green) reveals three marker chromosomes with centromere translocations involving chr9 and one with whole-arm deletion.

**(f)** Fluorescence in situ hybridization (FISH) using a 15q15.3 BAC clone probe (green) identified an isochromosome 15q or Robertsonian translocation.

**Supplementary Figure 12**

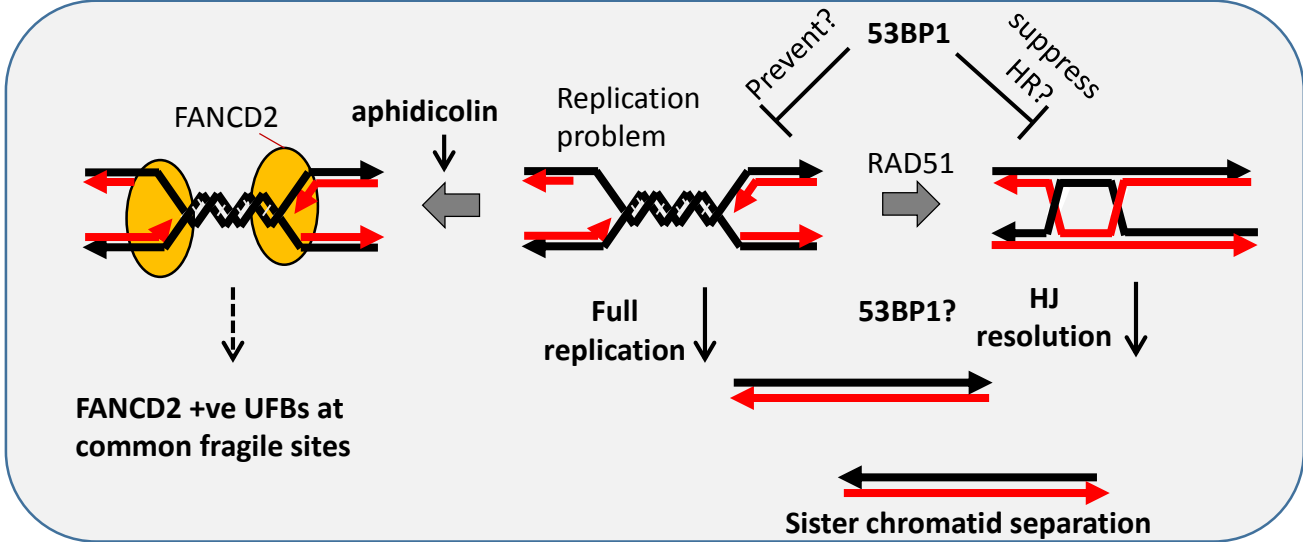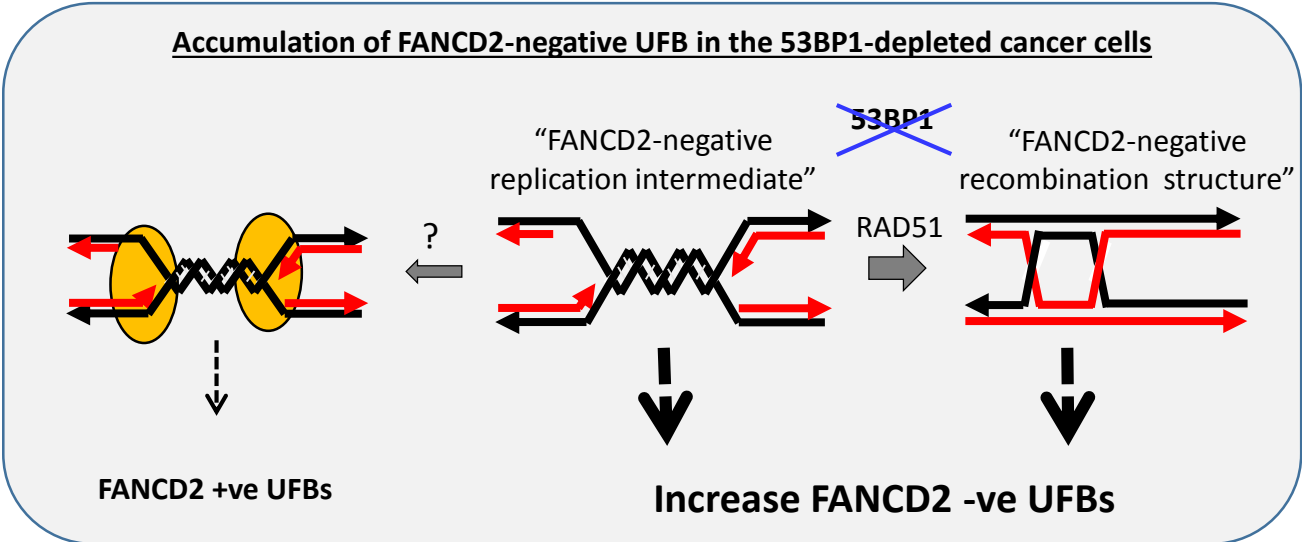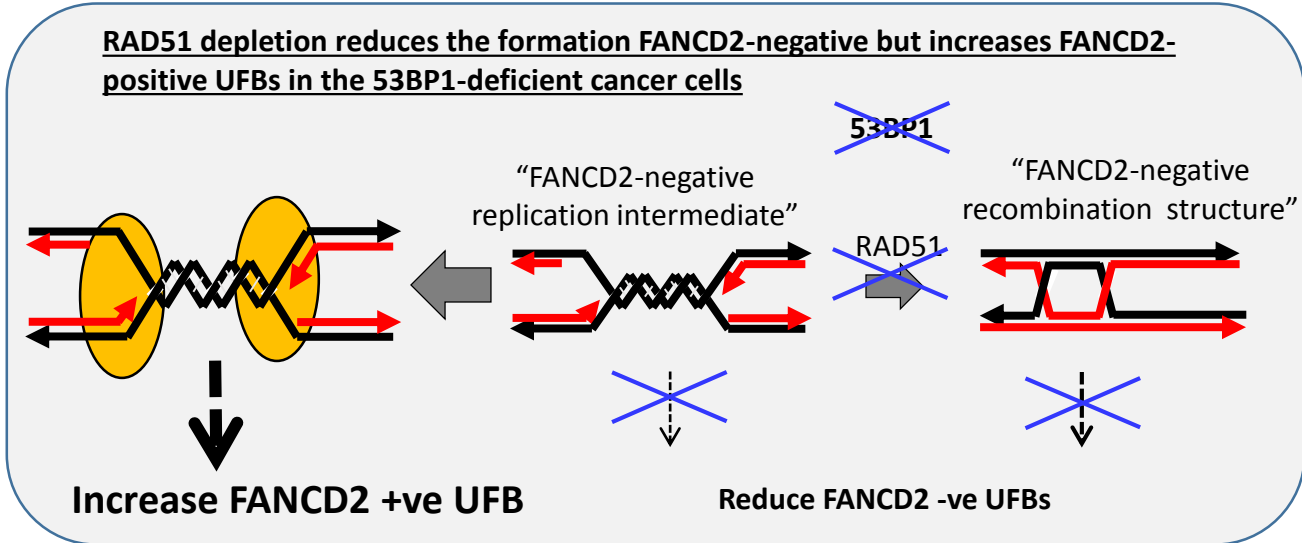

Supplementary Figure 12. A model depicts the possible mechanisms of the formation of sister chromatid intertwinements in 53BP1-depleted cancer cells.
